# Supplementary material for: Mechanism of molnupiravir-induced SARS-CoV-2 mutagenesis
Source: Springer Nature journal article supplement (doi:10.1038/s41594-021-00651-0), 2021-08-11
Supplement: MOESM1 [file 41594_2021_651_MOESM1_ESM.pdf › 41594_2021_651_MOESM1_ESM.pdf]

---

**Supplementary information**

---

**Mechanism of molnupiravir-induced SARS-CoV-2 mutagenesis**

---

In the format provided by the  
authors and unedited

## Supplementary information

### Mechanism of molnupiravir-induced SARS-CoV-2 mutagenesis

Florian Kabinger<sup>1\*</sup>, Carina Stiller<sup>2\*</sup>, Jana Schmitzová<sup>1\*</sup>, Christian Dienemann<sup>1</sup>, Goran Kokic<sup>1</sup>, Hauke S. Hillen<sup>3,4</sup>, Claudia Höbartner<sup>2,#</sup> and Patrick Cramer<sup>1,#</sup>

<sup>1</sup>Max Planck Institute for Biophysical Chemistry, Department of Molecular Biology, Am Fassberg 11, 37077 Göttingen, Germany. <sup>2</sup>Universität Würzburg, Lehrstuhl für Organische Chemie I, Am Hubland, 97074 Würzburg, Germany. <sup>3</sup>University Medical Center Göttingen, Department of Cellular Biochemistry, Humboldtallee 23, 37073 Göttingen, Germany. <sup>4</sup>Max Planck Institute for Biophysical Chemistry, Research Group Structure and Function of Molecular Machines, Am Fassberg 11, 37077 Göttingen, Germany. \*These authors contributed equally.

**Supplementary Table 1: RNA substrates**

| RNA oligonucleotide               | Sequence                                                                                                                                  |
|-----------------------------------|-------------------------------------------------------------------------------------------------------------------------------------------|
| Product                           | /56-FAM/rUrGrA rGrCrC rUrArC rGrCrA rGrU                                                                                                  |
| Template 1                        | 5' rUrUrU rArArC rUrGrC rGrUrA ddC 3'                                                                                                     |
| Template 2                        | 5 rCrCrC rUrArC rUrGrC rGrUrA ddC 3'                                                                                                      |
| Template 3                        | 5' rUrUrU rCrArC rUrGrC rGrUrA ddC 3'                                                                                                     |
| Template 4                        | 5' rUrUrU rGrArC rUrGrC rGrUrA ddC 3'                                                                                                     |
| Template 5                        | 5' rUrUrU MrArC rUrGrC rGrUrA ddC 3'                                                                                                      |
| Template 6 (structure)            | 5' rGrGrG MrArC rUrGrC rGrUrA-3'                                                                                                          |
| RNA-hairpin duplex<br>(structure) | 5' rGrCrU rCrArU rArCrC rGrUrA rUrUrG rArGrA<br>rCrCrU rUrUrU rGrGrU rCrUrC rArArU rArCrG rGrUrA<br>rUrGrA rGrCrC rUrArC rGrCrA rGrUrA 3' |
| RNA-hairpin duplex<br>(structure) | 5' rGrCrU rCrArU rArCrC rGrUrA rUrUrG rArGrA<br>rCrCrU rUrUrU rGrGrU rCrUrC rArArU rArCrG rGrUrA<br>rUrGrA rGrCrC rUrArC rGrCrA rGrUrG 3' |
| RNA-hairpin<br>duplex             | /56-FAM/rUrUrU rUrCrA rUrGrC rArCrC rGrCrG<br>rUrArG rUrUrU rUrCrU rArCrG rCrG-3'                                                         |

**Supplementary Table 2. Thermal melting analysis**

| sequence<br><b>R – Y</b> | 5'CACUGCGUAG <b>R</b> <sup>a</sup><br>3'GUGACGCAUC <b>Y</b> GAGU5' | 5'CACUGCGUAG <b>R</b> CUCA3'<br>3'GUGACGCAUC <b>Y</b> GAGU5' | 5'CA <b>Y</b> UGCGUAGGCUCA3'<br>3'GU <b>R</b> ACGCAUCCGAGU5' |
|--------------------------|--------------------------------------------------------------------|--------------------------------------------------------------|--------------------------------------------------------------|
| <b>G – C</b>             | <b>64.7 °C</b>                                                     | <b>77.6 °C</b>                                               | <b>77.6 °C</b>                                               |
| <b>G – M</b>             | <b>61.2 °C</b>                                                     | <b>71.2 °C</b>                                               | <b>73.2 °C</b>                                               |
| <b>A – M</b>             | <b>60.6 °C</b>                                                     | <b>68.2 °C</b>                                               | <b>73.8 °C</b>                                               |

<sup>a</sup> R = G or A, Y = C or M

**Supplementary Table 3. Sequences and high-resolution ESI-MS data of NHC/**M**-modified RNA oligonucleotides**

| Name       | 5'-sequence-3'           | nt | formula                                                                            | Mass calc. | Mass found |
|------------|--------------------------|----|------------------------------------------------------------------------------------|------------|------------|
| <b>M_T</b> | GGG <b>M</b> ACUGCGUAp   | 12 | C <sub>115</sub> H <sub>144</sub> N <sub>48</sub> O <sub>86</sub> P <sub>12</sub>  | 3944.5221  | 3944.5297  |
| <b>M_1</b> | <b>M</b> ACUGCGUAGGCUCA  | 15 | C <sub>142</sub> H <sub>178</sub> N <sub>56</sub> O <sub>104</sub> P <sub>14</sub> | 4764.6688  | 4764.6760  |
| <b>M_3</b> | C <b>M</b> UGCGUAGGCUCA  | 15 | C <sub>142</sub> H <sub>178</sub> N <sub>56</sub> O <sub>104</sub> P <sub>14</sub> | 4764.6688  | 4764.6797  |
| <b>M_5</b> | UGAG <b>M</b> CUACGCAGUG | 15 | C <sub>143</sub> H <sub>178</sub> N <sub>58</sub> O <sub>104</sub> P <sub>14</sub> | 4804.6749  | 4804.6684  |

## Supplementary Data Set 1: NMR spectra of synthetic compounds

### 5'-*O*-(4,4'-Dimethoxytrityl)-*N*<sup>4</sup>-hydroxy-2'-*O*-(triisopropylsilyloxy)methylcytidine (compound 1)

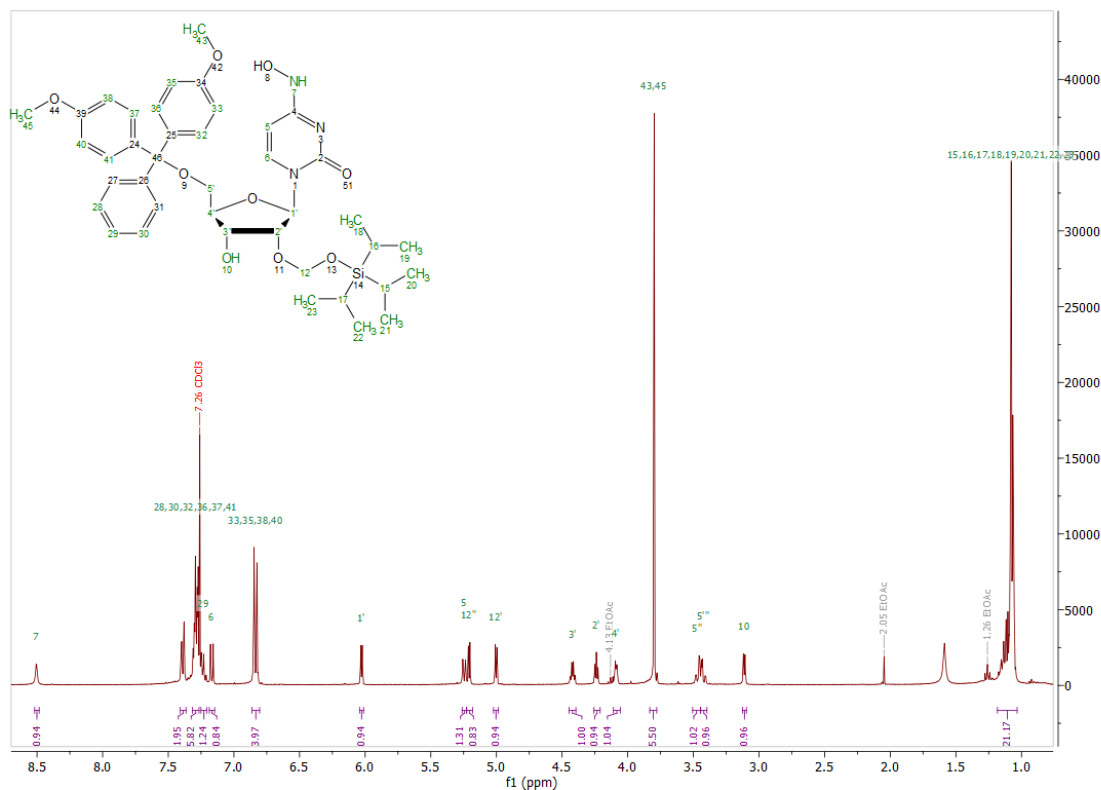

#### <sup>1</sup>H-NMR (400 MHz, CDCl<sub>3</sub>) of compound 1.

<sup>1</sup>H NMR (400 MHz, CDCl<sub>3</sub>):  $\delta$  (ppm) = 1.04 – 1.15 (m, 21H, Si(CH(CH<sub>3</sub>)<sub>2</sub>)<sub>3</sub>), 3.13 (d,  $J$  = 4.7 Hz, 1H, C3'-OH), 3.40 – 3.45 (dd,  $J$  = 2.8, 10.8 Hz, 1H, H-5'b), 3.45 – 3.49 (dd,  $J$  = 2.4, 10.8 Hz, 1H, H-5'a), 3.80 (s, 6H, OCH<sub>3</sub>), 4.07 – 4.11 (dt,  $J$  = 2.6, 5.1 Hz, 1H, H-4'), 4.24 (t,  $J$  = 4.8 Hz, 1H, H-2'), 4.38 – 4.46 (q,  $J$  = 4.8 Hz, 1H, H-3'), 5.00 (d,  $J$  = 4.8 Hz, 1H, OCH<sub>2</sub>O), 5.20 (d,  $J$  = 4.8 Hz, 1H, OCH<sub>2</sub>O), 5.25 (d,  $J$  = 8.3 Hz, 1H, H-5), 6.03 (d,  $J$  = 4.4 Hz, 1H, H-1'), 6.79 – 6.88 (m, 4H, DMT), 7.17 (d,  $J$  = 8.3 Hz, 1H, H-6), 7.18 – 7.27 (m, 1H, DMT), 7.24 – 7.33 (m, 6H, DMT), 7.35 – 7.42 (m, 2H, DMT), 8.53 (s, NH).

HR-MS (ESI<sup>+</sup>): Exact mass calculated for C<sub>40</sub>H<sub>53</sub>NaN<sub>3</sub>O<sub>9</sub>Si [M+Na]<sup>+</sup>: 770.3443, found: 770.3459.

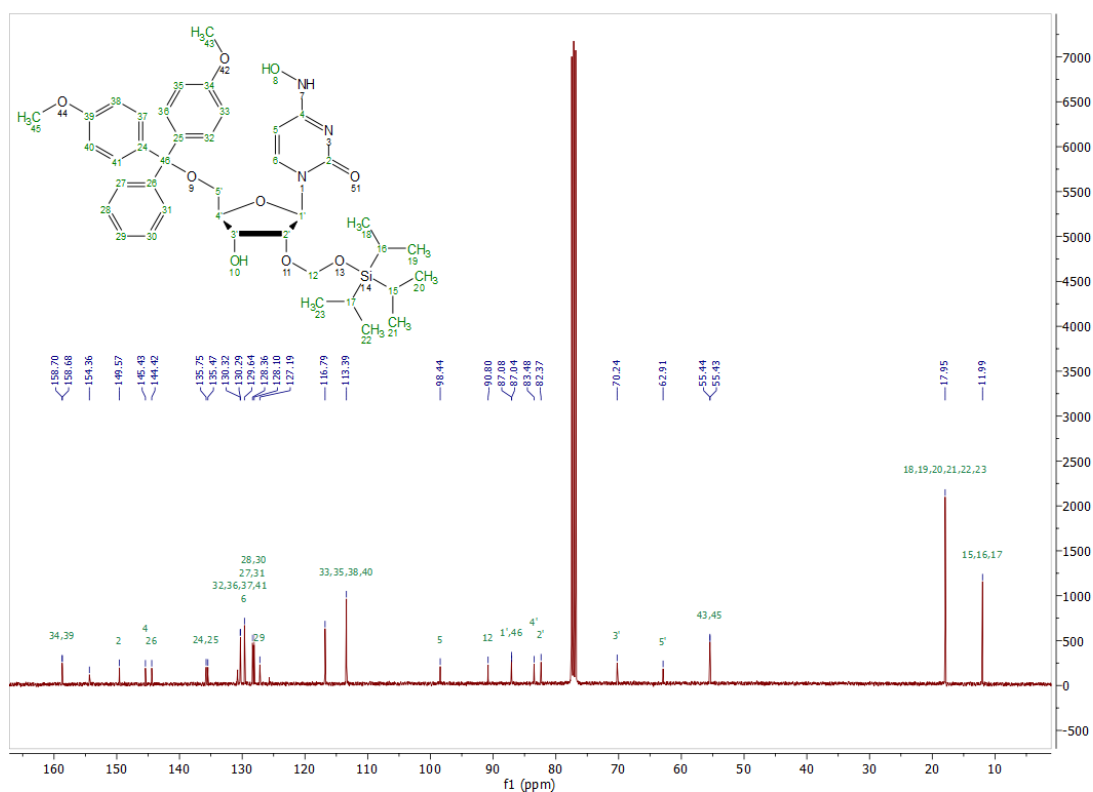

**$^{13}\text{C}$ -NMR (100 MHz,  $\text{CDCl}_3$ ) of compound 1.**

$^{13}\text{C}$ -NMR (100 MHz,  $\text{CDCl}_3$ ):  $\delta$  (ppm) = 11.99, 17.95 ( $\text{Si}(\text{CH}(\text{CH}_3)_2)_3$ ), 55.43, 55.44 ( $\text{OCH}_3$ ), 62.91 ( $\text{C}5'$ ), 70.24 ( $\text{C}3'$ ), 82.37 ( $\text{C}2'$ ), 83.48 ( $\text{C}4'$ ), 87.04, 87.08 ( $\text{C}1'$ ,  $\text{C}_q\text{-DMT}$ ), 90.80 ( $\text{OCH}_2\text{O}$ ), 98.44 ( $\text{C}5$ ), 113.39 ( $\text{DMT}$ ), 127.19 ( $\text{DMT}$ ), 128.10 ( $\text{DMT}$ ), 128.36 ( $\text{DMT}$ ), 129.64 ( $\text{C}6$ ), 130.29, 130.32 ( $\text{DMT}$ ), 135.47 135.75 ( $\text{C}_q\text{-DMT}$ ), 144.42 ( $\text{C}_q\text{-DMT}$ ), 145.43 ( $\text{C}4$ ), 149.57 ( $\text{C}2$ ), 158.68, 158.70 ( $\text{C}_q\text{-OCH}_3$ ).

***N*<sup>4</sup>-Benzoyl-5'-*O*-(4,4'-dimethoxytrityl)-*N*<sup>4</sup>-hydroxy-2'-*O*-(triisopropylsilyloxy)methyl cytidine (compound 2)**

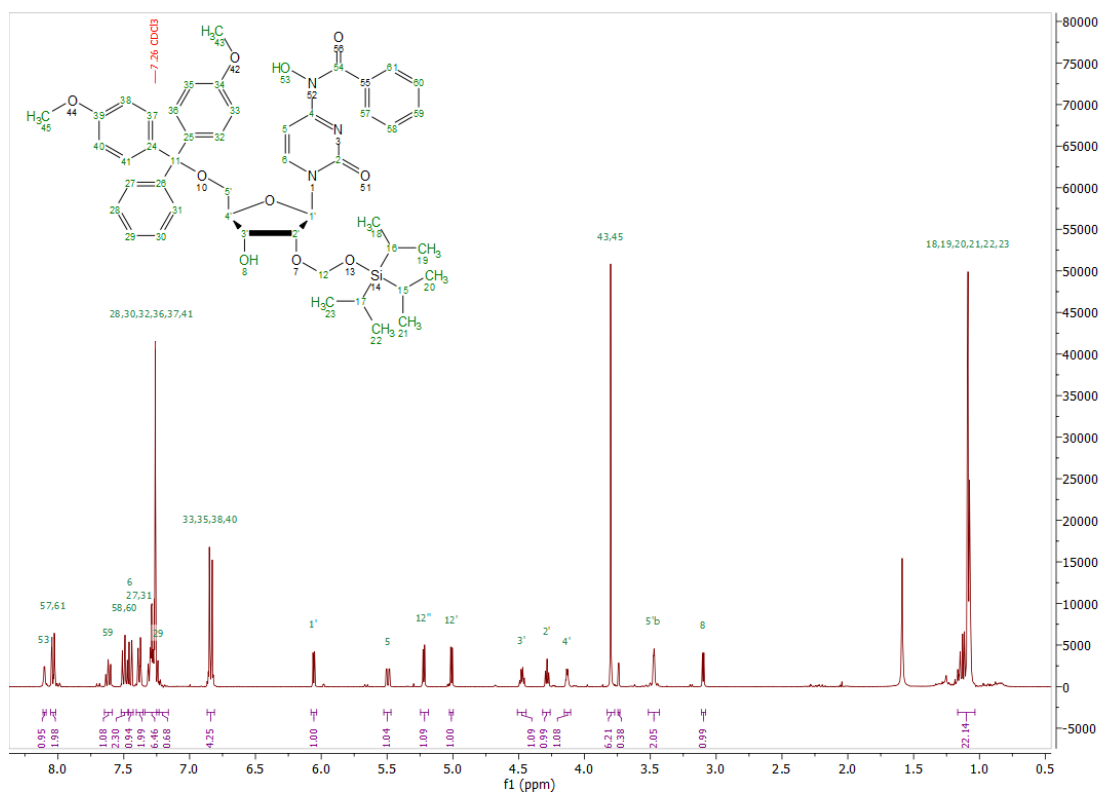

**<sup>1</sup>H-NMR (400 MHz, CDCl<sub>3</sub>) of compound 2.**

<sup>1</sup>H NMR (400 MHz, CDCl<sub>3</sub>):  $\delta$  (ppm) = 1.05 – 1.10 (m, 21H, Si(CH(CH<sub>3</sub>)<sub>2</sub>)<sub>3</sub>), 3.10 (d,  $J$  = 4.4 Hz, 1H, C3'-OH), 3.44 – 3.50 (m, 2H, H-5'), 3.80 (2s, 6H, OCH<sub>3</sub>), 4.11 – 4.16 (m, 1H, H-4'), 4.28 (t,  $J$  = 4.9 Hz, 1H, H-2'), 4.48 (q,  $J$  = 4.6 Hz, 1H, H-3''), 5.01 (d,  $J$  = 4.8 Hz, 1H, OCH<sub>2</sub>O), 5.22 (d,  $J$  = 4.8 Hz, 1H, OCH<sub>2</sub>O), 5.49 (dd,  $J$  = 2.3, 8.3 Hz, 1H, H-5), 6.06 (d,  $J$  = 4.7 Hz, 1H, H-1'), 6.81 – 6.86 (m, 4H, DMT), 7.22 – 7.34 (m, 6H, DMT), 7.36 – 7.40 (m, 2H, DMT), 7.45 (d,  $J$  = 8.3 Hz, 1H, H-6), 7.48 – 7.53 (m, 2H, bz), 7.60 – 7.64 (m, 1H, bz), 8.02 – 8.05 (m, 2H, bz), 8.10 (d,  $J$  = 2.2 Hz, 1H, OH).

HR-MS (ESI<sup>+</sup>): Exact mass calculated for C<sub>47</sub>H<sub>57</sub>N<sub>3</sub>NaO<sub>10</sub>Si [M+Na]<sup>+</sup>: 874.3705, found: 874.3727.



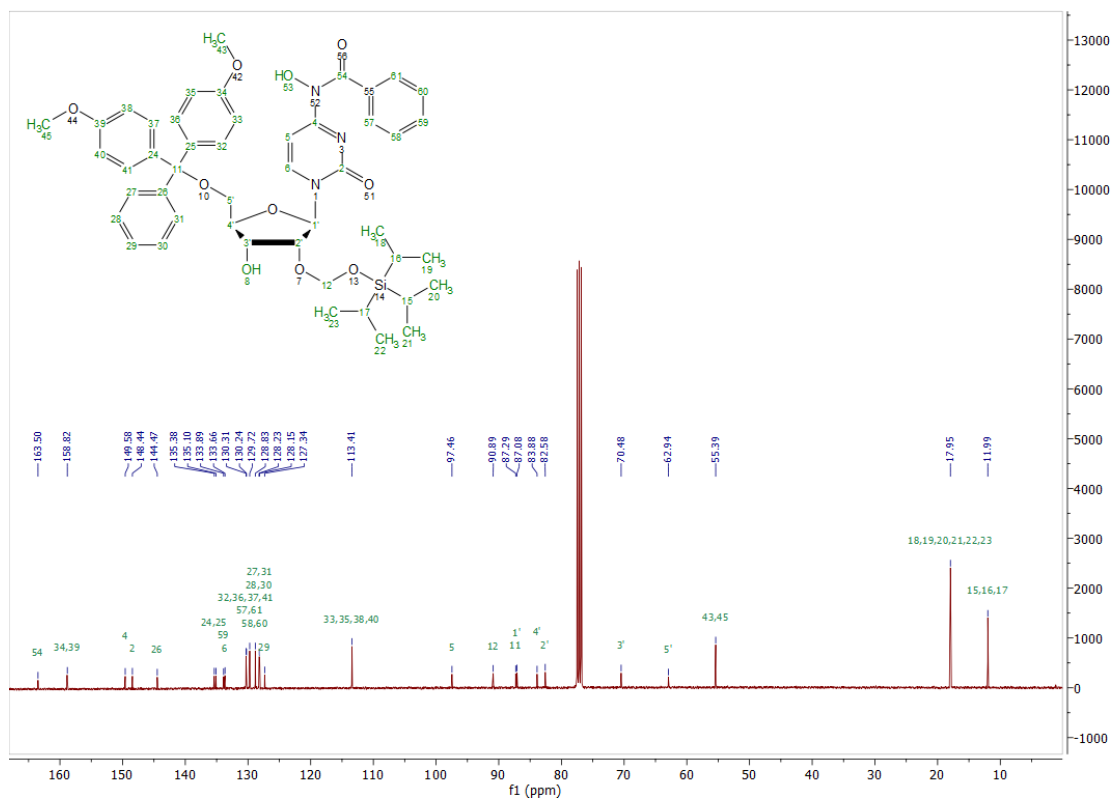

**$^{13}\text{C}$ -NMR (100 MHz,  $\text{CDCl}_3$ ) of compound 2.**

$^{13}\text{C}$ - NMR (100 MHz,  $\text{CDCl}_3$ ):  $\delta$  (ppm) = 11.99, 17.95 ( $\text{Si}(\text{CH}(\text{CH}_3)_2)_3$ ), 55.39 ( $\text{OCH}_3$ ), 62.94 ( $\text{C}5'$ ), 70.48 ( $\text{C}3'$ ), 82.58 ( $2'$ ), 83.88 ( $4'$ ), 87.08 ( $1'$ ), 87.29 ( $\text{C}_q\text{-DMT}$ ), 90.89 ( $\text{OCH}_2\text{O}$ ), 97.46 ( $\text{C}5$ ), 113.41 ( $\text{DMT}$ ), 127.34 ( $\text{DMT}$ ), 128.15, 128.23 ( $\text{DMT}$ ), 128.83 ( $\text{bz}$ ), 129.72 ( $\text{bz}$ ), 130.24, 130.31 ( $\text{DMT}$ ), 130.66 ( $\text{C}6$ ), 133.89 ( $\text{bz}$ ), 135.10, 135.38 ( $\text{C}_q\text{-DMT}$ ), 144.47 ( $\text{C}_q\text{-DMT}$ ), 1448.44 ( $\text{C}2$ ), 149.58 ( $\text{C}4$ ), 158.82 ( $\text{C}_q\text{-OCH}_3$ ), 163.50 ( $\text{C}=\text{O}$ ).

***N*<sup>4</sup>-Benzoyl-5'-*O*-(4,4'-dimethoxytrityl)-*N*<sup>4</sup>-hydroxy-2'-*O*-(triisopropylsilyloxy)methyl cytidine 3'-cyanoethyl-*N,N*-diisopropylphosphoramidite (compound 3, M-PA)**

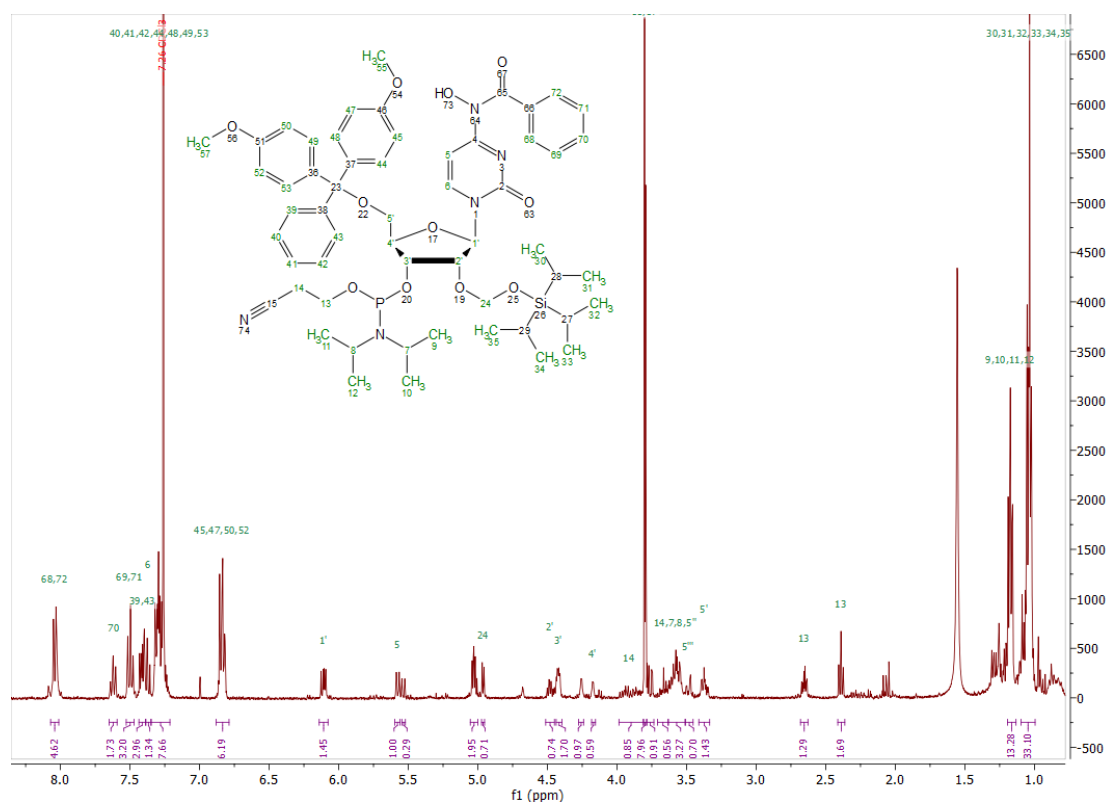

**<sup>1</sup>H-NMR (400 MHz, CDCl<sub>3</sub>) of compound 3, M-PA.**

<sup>1</sup>H NMR (400 MHz, CDCl<sub>3</sub>): δ (ppm) = 1.00 – 1.10 (m, 33H, Si(CH(CH<sub>3</sub>)<sub>2</sub>)<sub>3</sub>, diast.), 1.13 – 1.19 (m, 13H, NCH(CH<sub>3</sub>)<sub>2</sub>), 2.36 – 2.41 (t, *J* = 6.4 Hz, 2H, POCH<sub>2</sub>), 2.63 – 2.68 (td, *J* = 2.9, 6.4 Hz, 1H, POCH<sub>2</sub>, diast.), 3.33 – 3.41 (m, 1H, H-5', diast.), 3.45 – 3.51 (m, 1H, H-5', diast.), 3.51 – 3.63 (m, 3H, H-5', NCH(CH<sub>3</sub>)<sub>2</sub>, CH<sub>2</sub>-CN), 3.63 – 3.71 (m, 1H, CH<sub>2</sub>-CN, diast.), 3.79 – 3.81 (s, 6H, OCH<sub>3</sub>), 3.81 – 3.99 (m, 1H, CH<sub>2</sub>-CN), 4.15 – 4.18 (m, 1H, H-4', diast.), 4.24 – 4.28 (m, 1H, H-4'), 4.39 – 4.44 (m, 2H, H-2', H-3'), 4.45 – 4.51 (q, *J* = 5.6 Hz, 1H, H-2'), 4.96 (d, *J* = 5.0 Hz, 1H, OCH<sub>2</sub>O, diast.), 5.00 – 5.05 (m, 2H, OCH<sub>2</sub>O), 5.54 (d, *J* = 8.2 Hz, 1H, C-5, diast.), 5.58 (d, *J* = 8.2 Hz, 1H, C-5, diast.), 6.08 – 6.14 (2d, *J* = 8.2 Hz, 1H, H-1'), 6.79 – 6.88 (m, 6H, DMT), 7.21 – 7.35 (m, 8H, DMT), 7.35 – 7.39 (m, 1H, H-6), 7.39 – 7.44 (m, 3H, DMT), 7.47 – 7.53 (m, 3H, bz), 7.59 – 7.65 (m, 2H, bz), 8.03 (m, 5H, bz).

HR-MS (ESI<sup>+</sup>): Exact mass calculated for C<sub>56</sub>H<sub>75</sub>N<sub>5</sub>O<sub>11</sub>PSi [M+H]<sup>+</sup>: 1052.4964, found: 1052.4933 and for C<sub>56</sub>H<sub>74</sub>N<sub>5</sub>NaO<sub>11</sub>PSi [M+Na]<sup>+</sup>: 1074.4784, found: 1074.4749

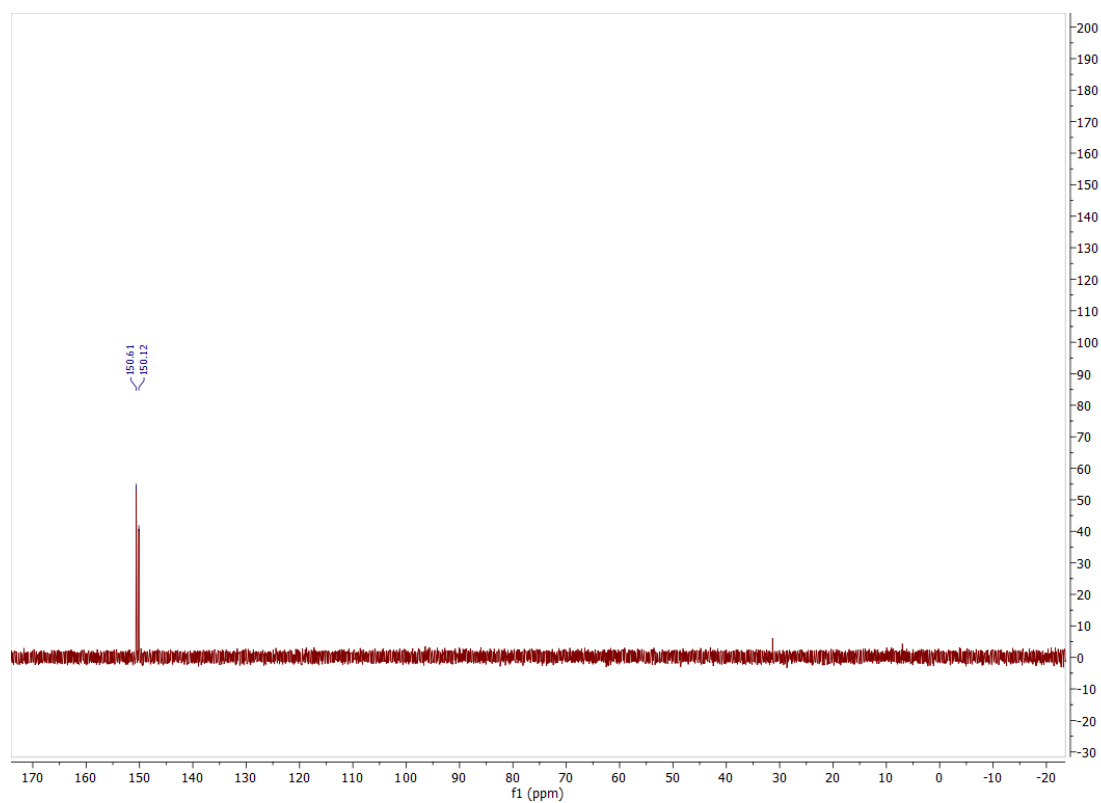

**$^{31}\text{P}$ -NMR (162 MHz,  $\text{CDCl}_3$ ) of compound 3, M-PA.**

$^{31}\text{P}$  NMR (162 MHz,  $\text{CDCl}_3$ ):  $\delta$  (ppm) = 150.12, 150.61.
